# Supplementary material for: Metagenomic Characterization and Volatile Compounds Determination in Rumen from Saanen Goat Kids Fed Olive Leaves
Source: MDPI journal article supplement (doi:10.3390/vetsci9090452), 2022-08-24
Supplement: s1 [file s1]

**Table S1.** Relative abundance (%) of the main genera identified in the control group (CTR) and experimental group (OL+).

| Genera                                        | CTR    | OL+    | P-value |
|-----------------------------------------------|--------|--------|---------|
| <i>Prevotella</i>                             | 40.089 | 36.913 | 0.5457  |
| <i>Subdivision5_genera_incertae_sedis</i>     | 7.684  | 16.185 | 0.0282  |
| <i>Paraprevotella</i>                         | 10.802 | 3.416  | 0.0454  |
| <i>Fibrobacter</i>                            | 3.668  | 6.526  | 0.0064  |
| <i>Oscillibacter</i>                          | 4.091  | 6.043  | 0.4069  |
| <i>Ruminococcus</i>                           | 2.542  | 4.303  | 0.0400  |
| <i>Ruminobacter</i>                           | 5.281  | 1.431  | 0.1238  |
| <i>Paludibacter</i>                           | 1.115  | 4.655  | 0.0016  |
| <i>Treponema</i>                              | 2.535  | 2.736  | 0.6969  |
| <i>Anaerocella</i>                            | 4.544  | 0.146  | 0.0229  |
| <i>Anaerobacterium</i>                        | 3.169  | 0.933  | 0.0216  |
| <i>Anaeroplasma</i>                           | 2.012  | 1.203  | 0.4247  |
| <i>Butyrivibrio</i>                           | 1.612  | 1.139  | 0.3840  |
| <i>Lachnospiracea_incertae_sedis</i>          | 1.358  | 1.265  | 0.7788  |
| <i>Sphaerochaeta</i>                          | 0.612  | 1.699  | 0.0173  |
| <i>Clostridium IV</i>                         | 0.568  | 1.139  | 0.1560  |
| <i>Saccharibacteria_genera_incertae_sedis</i> | 1.144  | 0.561  | 0.1961  |
| <i>Bacteroides</i>                            | 1.017  | 0.303  | 0.0012  |
| <i>Saccharofermentans</i>                     | 0.525  | 0.772  | 0.1204  |
| <i>Mogibacterium</i>                          | 0.473  | 0.724  | 0.3026  |
| <i>Christensenella</i>                        | 0.349  | 0.836  | 0.0119  |
| <i>Acetobacteroides</i>                       | 0.154  | 0.968  | 0.1930  |
| <i>Succinivibrio</i>                          | 0.757  | 0.234  | 0.1271  |
| <i>Rikenella</i>                              | 0.187  | 0.710  | 0.0017  |
| <i>Oligosphaera</i>                           | 0.214  | 0.617  | 0.0011  |
| <i>Pseudobutyrvibrio</i>                      | 0.557  | 0.257  | 0.0291  |
| <i>Succinivibrio</i>                          | 0.367  | 0.316  | 0.7520  |
| <i>Clostridium XIVa</i>                       | 0.125  | 0.535  | 0.0149  |
| <i>Olsenella</i>                              | 0.194  | 0.324  | 0.0784  |
| <i>Elusimicrobium</i>                         | 0.167  | 0.210  | 0.3628  |
| <i>Anaerovorax</i>                            | 0.052  | 0.309  | 0.0023  |
| <i>Candidatus Endomicrobium</i>               | 0.013  | 0.346  | 0.0010  |
| <i>Victivallis</i>                            | 0.089  | 0.246  | 0.1161  |
| <i>Vampirovibrio</i>                          | 0.191  | 0.136  | 0.4328  |
| <i>Selenomonas</i>                            | 0.189  | 0.053  | 0.0001  |
| <i>Blautia</i>                                | 0.088  | 0.147  | 0.1075  |
| <i>Atopobium</i>                              | 0.058  | 0.173  | 0.0157  |
| <i>Flavonifractor</i>                         | 0.220  | 0.004  | 0.0403  |
| <i>Intestinimonas</i>                         | 0.061  | 0.146  | 0.0366  |
| <i>Stomatobaculum</i>                         | 0.009  | 0.174  | 0.0021  |
| <i>Alloprevotella</i>                         | 0.073  | 0.109  | 0.2044  |
| <i>Eubacterium</i>                            | 0.058  | 0.118  | 0.0643  |

|                                    |       |       |        |
|------------------------------------|-------|-------|--------|
| <i>Coprococcus</i>                 | 0.020 | 0.155 | 0.0000 |
| <i>Barnesiella</i>                 | 0.109 | 0.016 | 0.2297 |
| <i>Asteroleplasma</i>              | 0.118 | 0.001 | 0.1450 |
| <i>Succinimonas</i>                | 0.119 | 0.000 | 0.1361 |
| <i>Syntrophococcus</i>             | 0.046 | 0.066 | 0.4857 |
| <i>Anaerorhabdus</i>               | 0.005 | 0.091 | 0.0054 |
| <i>Roseburia</i>                   | 0.040 | 0.053 | 0.7145 |
| <i>Sporobacter</i>                 | 0.017 | 0.054 | 0.3102 |
| <i>Streptococcus</i>               | 0.040 | 0.030 | 0.4916 |
| <i>Clostridium XIVb</i>            | 0.042 | 0.027 | 0.3050 |
| <i>Bulleidia</i>                   | 0.007 | 0.057 | 0.0003 |
| <i>Acholeplasma</i>                | 0.032 | 0.021 | 0.5312 |
| <i>Slackia</i>                     | 0.016 | 0.029 | 0.1252 |
| <i>Bifidobacterium</i>             | 0.044 | 0.000 | 0.0006 |
| <i>Lachnobacterium</i>             | 0.039 | 0.000 | 0.0378 |
| <i>Moryella</i>                    | 0.018 | 0.021 | 0.8041 |
| <i>Ethanoligenens</i>              | 0.012 | 0.026 | 0.1882 |
| <i>Anaerovibrio</i>                | 0.025 | 0.010 | 0.0042 |
| <i>Schwartzia</i>                  | 0.005 | 0.029 | 0.0858 |
| <i>Phocaeicola</i>                 | 0.013 | 0.021 | 0.7102 |
| <i>Aestuariispira</i>              | 0.019 | 0.014 | 0.6658 |
| <i>Kandleria</i>                   | 0.031 | 0.000 | 0.0100 |
| <i>Acetatifactor</i>               | 0.010 | 0.021 | 0.5454 |
| <i>Sutterella</i>                  | 0.008 | 0.017 | 0.4340 |
| <i>Victivallis</i>                 | 0.022 | 0.003 | 0.1089 |
| <i>Methanobrevibacter</i>          | 0.012 | 0.012 | 0.9934 |
| <i>Lactobacillus</i>               | 0.024 | 0.000 | 0.0854 |
| <i>Papillibacter</i>               | 0.003 | 0.018 | 0.0068 |
| <i>Streptophyta</i>                | 0.008 | 0.011 | 0.3460 |
| <i>Desulfuromonas</i>              | 0.000 | 0.017 | 0.0106 |
| <i>Pseudoflavonifractor</i>        | 0.000 | 0.013 | 0.2772 |
| <i>Campylobacter</i>               | 0.008 | 0.005 | 0.3089 |
| <i>Snodgrassella</i>               | 0.007 | 0.005 | 0.5179 |
| <i>Howardella</i>                  | 0.006 | 0.004 | 0.5870 |
| <i>Pseudoscardovia</i>             | 0.010 | 0.000 | 0.1470 |
| <i>Parasutterella</i>              | 0.001 | 0.008 | 0.0668 |
| <i>Methylobacterium</i>            | 0.007 | 0.002 | 0.2219 |
| <i>Acetanaerobacterium</i>         | 0.002 | 0.006 | 0.4352 |
| <i>Lactonifactor</i>               | 0.000 | 0.008 | 0.1369 |
| <i>Enterorhabdus</i>               | 0.003 | 0.005 | 0.4646 |
| <i>SR1_genera_incertaine_sedis</i> | 0.003 | 0.004 | 0.2595 |
| <i>Anaerofustis</i>                | 0.001 | 0.006 | 0.0076 |
| <i>Methanomassiliicoccus</i>       | 0.002 | 0.004 | 0.0382 |
| <i>Denitrobacterium</i>            | 0.001 | 0.005 | 0.0043 |
| <i>Phascolarctobacterium</i>       | 0.000 | 0.004 | 0.3306 |

|                                 |       |       |        |
|---------------------------------|-------|-------|--------|
| <i>Blastopirellula</i>          | 0.001 | 0.003 | 0.2184 |
| <i>Desulfovibrio</i>            | 0.002 | 0.001 | 0.5540 |
| <i>Hydrogenoanaerobacterium</i> | 0.001 | 0.002 | 0.1616 |
| <i>Pyramidobacter</i>           | 0.003 | 0.000 | 0.0600 |
| <i>Coriobacterium</i>           | 0.001 | 0.001 | 0.9185 |
| <i>Acinetobacter</i>            | 0.001 | 0.002 | 0.2138 |
| <i>Dorea</i>                    | 0.000 | 0.002 | 0.3306 |
| <i>Defluviitalea</i>            | 0.000 | 0.002 | 0.0014 |
| <i>Actinomyces</i>              | 0.001 | 0.001 | 0.3518 |
| <i>Oribacterium</i>             | 0.002 | 0.000 | 0.1408 |
| <i>Methanimicrococcus</i>       | 0.000 | 0.002 | 0.0081 |
| <i>Ruminococcus2</i>            | 0.002 | 0.000 | 0.2539 |
| <i>Lautropia</i>                | 0.000 | 0.002 | 0.0015 |
| <i>Catabacter</i>               | 0.000 | 0.002 | 0.0676 |
| <i>Neisseria</i>                | 0.001 | 0.001 | 0.8229 |
| <i>Faecalibacterium</i>         | 0.002 | 0.000 | 0.3306 |
| <i>Chryseobacterium</i>         | 0.002 | 0.000 | 0.4375 |
| <i>Moraxella</i>                | 0.002 | 0.000 | 0.3942 |
| <i>Desulfobulbus</i>            | 0.001 | 0.001 | 0.7291 |
| <i>Brachymonas</i>              | 0.001 | 0.000 | 0.0630 |
| <i>Eisenbergiella</i>           | 0.001 | 0.001 | 0.8732 |
| <i>Centipeda</i>                | 0.000 | 0.002 | 0.3306 |
| <i>Lachnoanaerobaculum</i>      | 0.001 | 0.001 | 0.5705 |
| <i>Anaerotruncus</i>            | 0.000 | 0.001 | 0.1818 |
| <i>Anaerobiospirillum</i>       | 0.001 | 0.001 | 0.9665 |
| <i>Fretibacterium</i>           | 0.001 | 0.001 | 0.6802 |
| <i>Pseudomonas</i>              | 0.001 | 0.001 | 0.8651 |
| <i>Alysiella</i>                | 0.000 | 0.001 | 0.0681 |
| <i>Corynebacterium</i>          | 0.001 | 0.000 | 0.3066 |
| <i>Staphylococcus</i>           | 0.000 | 0.001 | 0.6150 |
| <i>Pasteurella</i>              | 0.001 | 0.001 | 0.9688 |
| <i>Others</i>                   | 0.004 | 0.004 | 0.086  |

---
